# Supplementary material for: Enhanced photoelectrocatalytic performance of α-MnO2 by Sb and N charge compensation
Source: Royal Society of Chemistry journal article supplement (doi:10.1039/d1nj03937g), 2021-01-01
Supplement: d1nj03937g1.pdf [file d1nj03937g1.pdf]

## Electronic Supplementary Information

### Enhanced Photoelectrocatalytic performance of $\alpha$ -MnO<sub>2</sub> by Sb and N charge compensation

Minmin Guo<sup>a,\*</sup>, Huimin Yang<sup>b</sup>, Yuting Du<sup>a</sup>, Yingjin Wang<sup>a</sup>, Xiaojing Yang<sup>a</sup>

<sup>a</sup> Department of chemistry, Xinzhou Teachers University, Xinzhou 034000, PR China

<sup>b</sup> College of Chemistry and Chemical Engineering, Taiyuan University of Technology, Taiyuan 030024, PR China

New Journal of Chemistry to be published

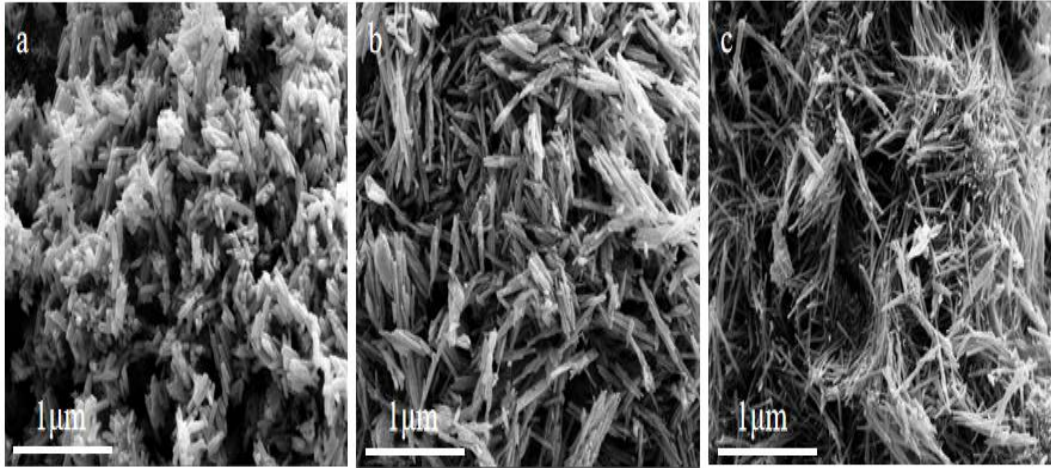

**Fig. S1** The SEM images of 2% (Sb,N)-MnO<sub>2</sub>(a), 4% (Sb,N)-MnO<sub>2</sub>(b) and 8% (Sb,N)-MnO<sub>2</sub>(c) nanorods

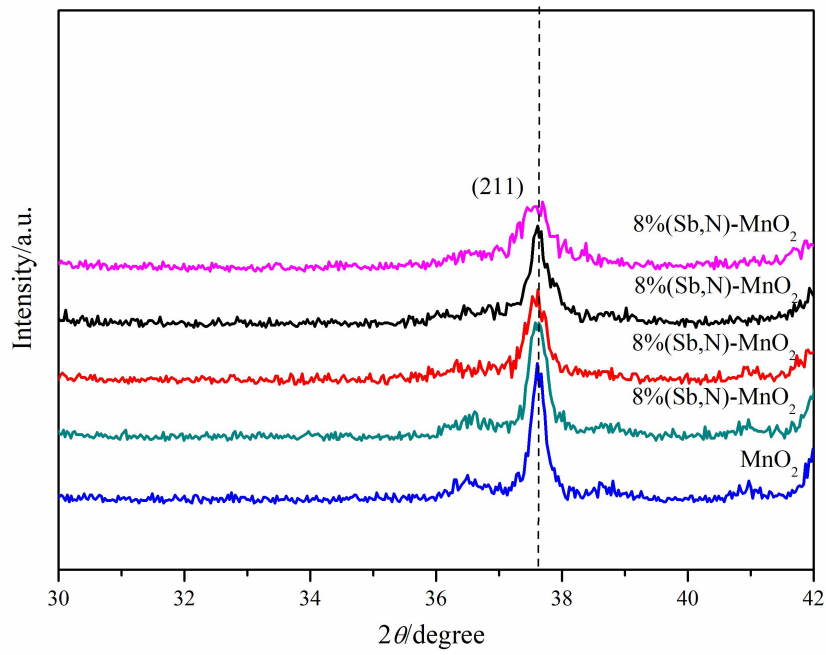

**Fig. S2** The enlarged XRD patterns of pure MnO<sub>2</sub> and (Sb,N)-MnO<sub>2</sub> with different doping ratios nanorods

**Table S1** Group space, lattice parameter, crystal size, BET surface area and pore volume of pure MnO<sub>2</sub> and (Sb,N)-MnO<sub>2</sub> with different doping ratios nanorods

|                                                  | MnO <sub>2</sub> | 2%<br>(Sb,N)-MnO <sub>2</sub> | 4%<br>(Sb,N)-MnO <sub>2</sub> | 6%<br>(Sb,N)-MnO <sub>2</sub> | 8%<br>(Sb,N)-MnO <sub>2</sub> |
|--------------------------------------------------|------------------|-------------------------------|-------------------------------|-------------------------------|-------------------------------|
| Group space                                      | I4/m             | I4/m                          | I4/m                          | I4/m                          | I4/m                          |
| Lattice Parameter a/Å                            | 9.786            | 9.779                         | 9.746                         | 9.728                         | 9.694                         |
| 2θ                                               | 37.666           | 37.582                        | 37.547                        | 37.502                        | 37.456                        |
| FWHM                                             | 0.267            | 0.310                         | 0.347                         | 0.353                         | 0.533                         |
| Crystal size/nm                                  | 33               | 28                            | 25                            | 24                            | 16                            |
| BET surface area/m <sup>2</sup> ·g <sup>-1</sup> | 37.098           | 49.286                        | 67.609                        | 103.642                       | 58.984                        |
| Pore Volume /cm <sup>3</sup> ·g <sup>-1</sup>    | 0.114            | 0.161                         | 0.2603                        | 0.452                         | 0.189                         |

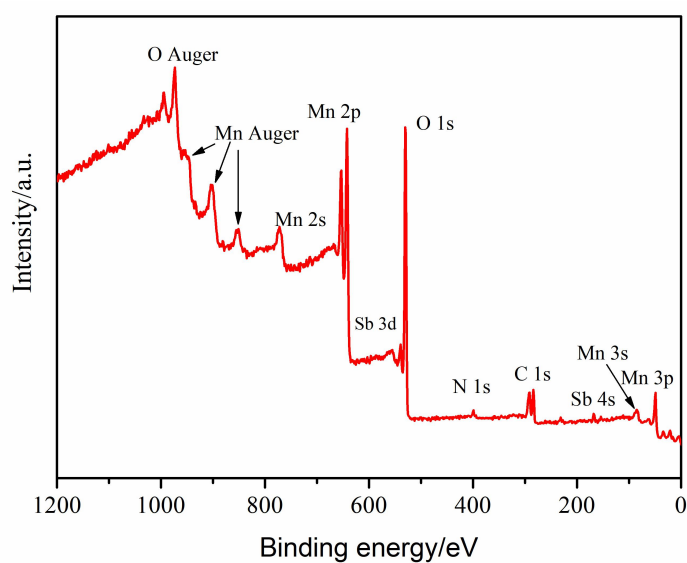

**Fig. S3** XPS survey spectra of 6% (Sb,N)-MnO<sub>2</sub> nanorods

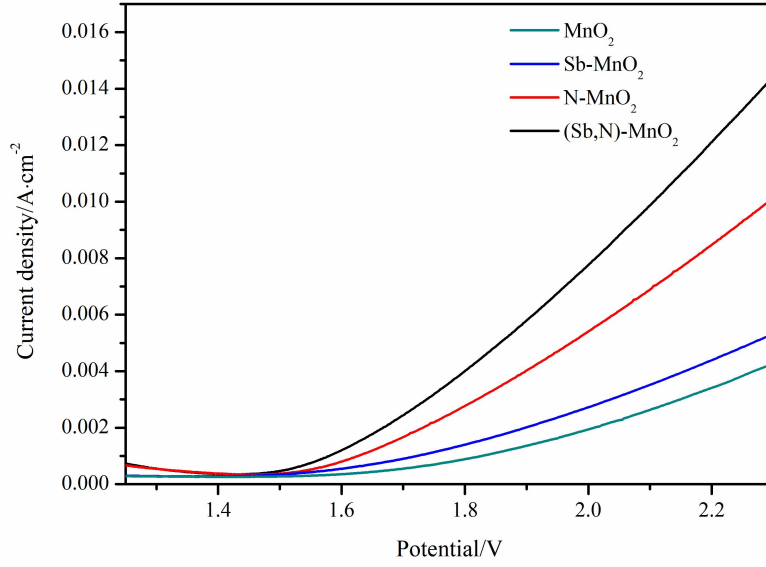

**Fig. S4** LSV curves of pure MnO<sub>2</sub>, Sb-MnO<sub>2</sub>, N-MnO<sub>2</sub> and (Sb,N)-MnO<sub>2</sub> electrodes

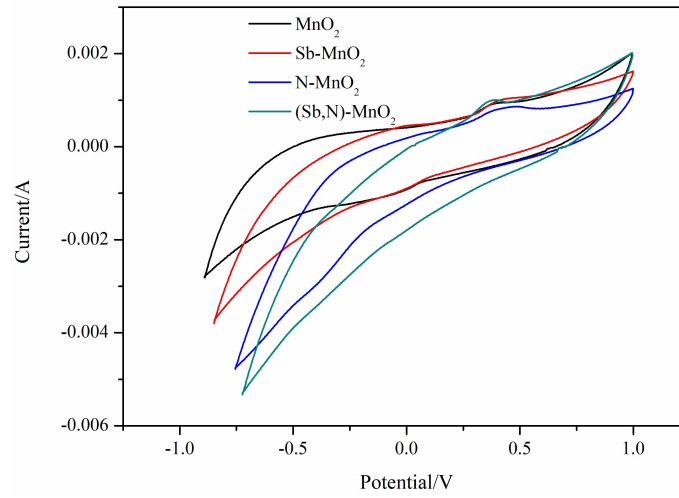

**Fig. S5** CV curves of pure MnO<sub>2</sub>, Sb-MnO<sub>2</sub>, N-MnO<sub>2</sub> and (Sb,N)-MnO<sub>2</sub> electrodes

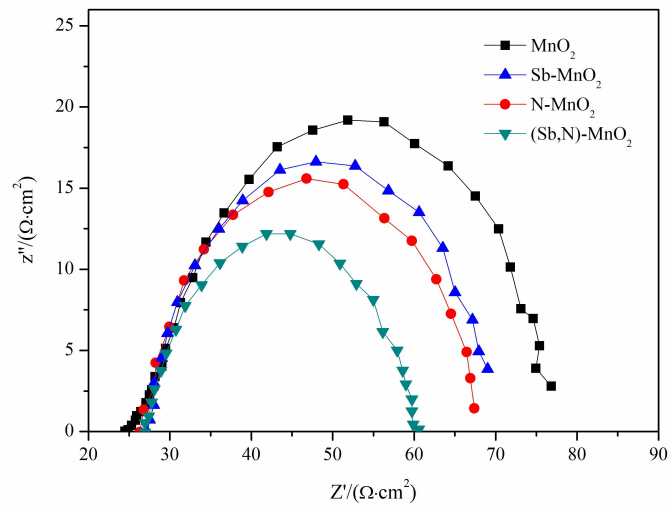

**Fig. S6** EIS curves of pure MnO<sub>2</sub>, Sb-MnO<sub>2</sub>, N-MnO<sub>2</sub> and (Sb,N)-MnO<sub>2</sub> electrodes

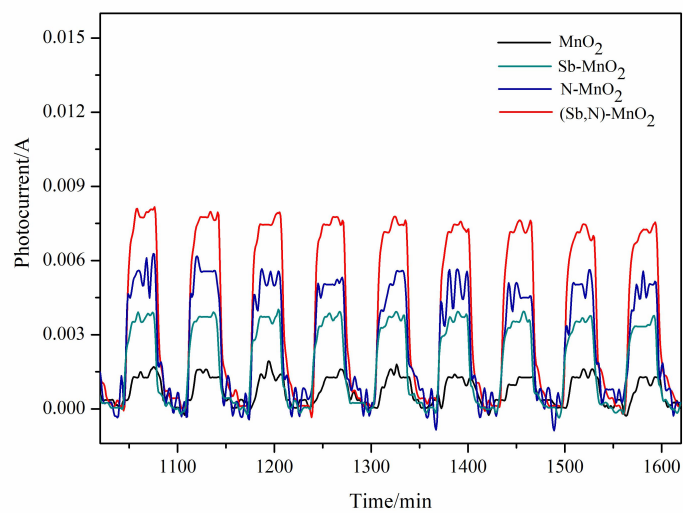

**Fig. S7** Transient photocurrent response of pure MnO<sub>2</sub>, Sb-MnO<sub>2</sub>, N-MnO<sub>2</sub> and (Sb,N)-MnO<sub>2</sub> electrodes

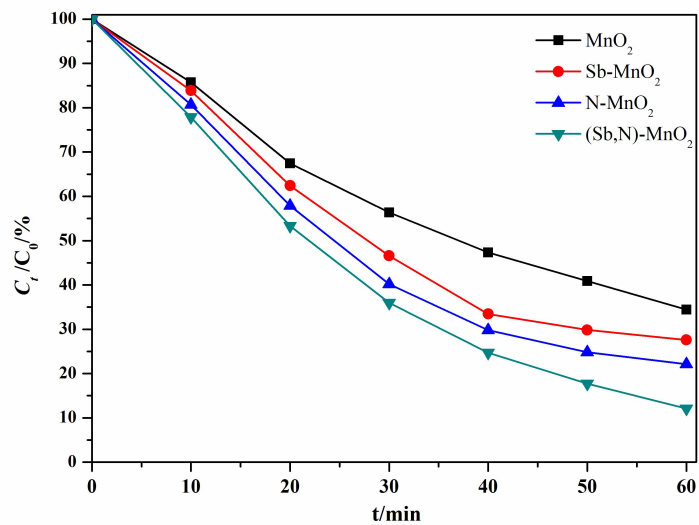

**Fig. S8** Relationship curves of photocatalytic time and the MB degradation efficiency of pure MnO<sub>2</sub>, Sb-MnO<sub>2</sub>, N-MnO<sub>2</sub> and (Sb,N)-MnO<sub>2</sub> nanorods

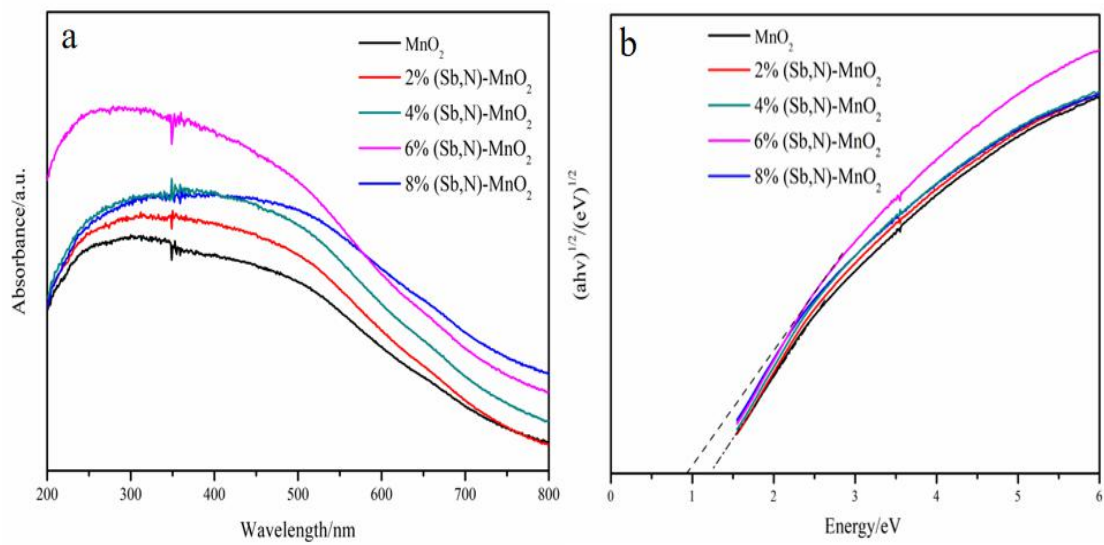

**Fig. S9** UV-Vis absorbance spectra (a) and plots of  $(ah\nu)^{1/2}$  vs photon energy (b) of different ratios of pure  $MnO_2$  and different ratios of  $(Sb,N)-MnO_2$
